# Supplementary material for: HO x and NO x production in oxidation flow reactors via photolysis of isopropyl nitrite, isopropyl nitrite-d 7 , and 1,3-propyl dinitrite at λ = 254, 350, and 369 nm
Source: Copernicus journal article supplement (doi:10.5194/amt-2018-225), 2018-08-14
Supplement: Supplementary file [file amt-2018-225-AC1-supplement.pdf]

**Response to reviewers for the paper “HO<sub>x</sub> and NO<sub>x</sub> production in oxidation flow reactors via photolysis of isopropyl nitrite, isopropyl nitrite-d<sub>7</sub>, and 1,3-propyl dinitrite at λ = 254, 350, and 369 nm.”**

We thank the reviewers for their comments on our paper. To guide the review process we have copied the reviewer comments in black text. Our responses are in regular blue font. We have responded to all the referee comments and made alterations to our paper (in bold text).

**Anonymous Referee #1**

The author developed a new method using alkyl nitrite photolysis as a source of OH radical and NO<sub>x</sub>. Kinetic modeling was done to support that a much wider range of NO:HO<sub>2</sub> ratio (10 -10000) was achieved. They present experimental and model characterization of the OH exposure and NO<sub>x</sub> levels generated via photolysis of C<sub>3</sub> alkyl nitrites in the Potential Aerosol Mass (PAM) OFR. Together with chemical ionization mass spectrometer measurements of multifunctional oxidation, the author compared the products α-pinene generated following the exposure of to HO<sub>x</sub> and NO<sub>x</sub> obtained using both isopropyl nitrite and O<sub>3</sub> + H<sub>2</sub>O + N<sub>2</sub>O methods. This new method proposed by Lambe et al. would open the prospect of OFR experiments at high NO. The paper is well written and organized. Few issues need to be addressed.

R1.1) While the author uses alkyl nitrates as a source of HO<sub>x</sub> and NO<sub>x</sub> in the oxidation flow reactor, their method provides a wider range of NO:HO<sub>2</sub> ratio and lower OH exposure. The chemical ionization mass spectrometer measurements of α-pinene oxidation products from different alkyl nitrates experiments are somehow comparable to some ambient measurement. While this method sounds promising, I would also be glad to know any disadvantage of using this method as it is important for the oxidation flow reactor users to avoid unwanted chemical reactions. For example, by photolysis of alkyl nitrate, we will generate a lot of RO, RO<sub>2</sub> and R radicals. These radicals may also involve in the further reactions with intermediates from the oxidation of injected VOCs. Therefore produce additional products other than only from the oxidation of injected VOCs. I wonder if the author observes any such kind of products in their mass spectra data? Is this process significant?

We modified the text as follows:

P12, L18-26: “Taken together, OFR254/**OFR185-iN<sub>2</sub>O** and OFR369-i(iPrONO/iPrONO-d<sub>7</sub>) are complementary methods that provide additional flexibility for NO<sub>x</sub>-dependent OFR studies. **OFR254/OFR185-iN<sub>2</sub>O generate variable-NO<sub>x</sub> photooxidation conditions (NO:HO<sub>2</sub>≈0 - 100), and are suitable for the characterization of multigenerational oxidative aging processes at up to OH<sub>exp</sub> ~ (5-10)\*10<sup>11</sup> molecules cm<sup>-3</sup> s (~5-10 eq. days).** OFR369-i(iPrONO)/OFR369-i(iPrONO-d<sub>7</sub>) generate high-NO photooxidation conditions (NO:HO<sub>2</sub>≈10 - 10000) with minimal O<sub>3</sub> and NO<sub>3</sub> formation at longer photolysis wavelength than OFR254/185-iN<sub>2</sub>O. We anticipate that alkyl nitrite photolysis is **advantageous** for the characterization of first-generation, high-NO<sub>x</sub> photooxidation products of most precursors **at up to OH<sub>exp</sub> ~ 1\*10<sup>11</sup> molecules cm<sup>-3</sup> s (1 eq. day), which is comparable to environmental chambers investigating high-NO<sub>x</sub> conditions.** The generation of OD (rather than OH) via OFR369-i(iPrONO-d<sub>7</sub>) may be useful in photooxidation

studies of unsaturated precursors due to the shift on the m/z of the addition products, though at the potential expense of generating more complex distributions of oxidation products. **Potential disadvantages of using alkyl nitrite photolysis as a HO<sub>x</sub> source are: (1) restriction to high-NO photochemical conditions; (2) restriction to OH<sub>exp</sub> of 1 eq. day or less; (3) additional complexity involved with integration of the alkyl nitrite source (compared to O<sub>3</sub> + H<sub>2</sub>O + N<sub>2</sub>O); (4) potential inability to retrofit a specific OFR design with blacklights; (5) it acts as an interference that precludes NO<sub>x</sub> measurements by chemiluminescence detection.**

In regards to the reviewer's comment about R, RO, and RO<sub>2</sub> radicals produced from isopropyl nitrite photolysis, the species that are treated in our model (R5-R17) include:

R: CH<sub>3</sub>

RO: i-C<sub>3</sub>H<sub>7</sub>O, CH<sub>3</sub>CO, HCO

RO<sub>2</sub>: CH<sub>3</sub>O<sub>2</sub>, CH<sub>3</sub>C(O)O<sub>2</sub>

Of the above species, in the presence of oxygen -- typically the case in most modern OFR studies -- all of the R and RO species (CH<sub>3</sub>, i-C<sub>3</sub>H<sub>7</sub>O, CH<sub>3</sub>CO, and HCO) are too short-lived to directly participate in reactions with RO<sub>2</sub> radicals formed from the oxidation of injected VOCs:

- CH<sub>3</sub> + O<sub>2</sub> generates CH<sub>3</sub>O<sub>2</sub>
- i-C<sub>3</sub>H<sub>7</sub>O + O<sub>2</sub> mostly generates HO<sub>2</sub> and acetone
- CH<sub>3</sub>CO + O<sub>2</sub> generates CH<sub>3</sub>C(O)O<sub>2</sub>
- HCO + O<sub>2</sub> generates CO + HO<sub>2</sub>

Thus, the most potentially problematic species include CH<sub>3</sub>O<sub>2</sub> and CH<sub>3</sub>C(O)O<sub>2</sub>, which could participate in reactions with organic peroxy radicals generated from photooxidation of injected VOCs. Because generation of CH<sub>3</sub>O<sub>2</sub> and CH<sub>3</sub>C(O)O<sub>2</sub> only proceeds via iPrONO + hv → CH<sub>3</sub>CHO + CH<sub>3</sub>• + NO (R6), which has an estimated quantum yield of ~0.04 (P6, L16), the relative importance of these reactions is likely minor.

We modified the text as follows:

P6, L15-L16: "We assumed the quantum yield of Reaction R5 to be 0.5 **above 350 nm** (Raff and Finlayson-Pitts, 2010). **We assumed the quantum yield** of Reaction R6 to be 0.04 above 350 nm (value for t-butyl nitrite) (Calvert and Pitts, 1966), **suggesting minimal influence of CH<sub>3</sub>O<sub>2</sub> and CH<sub>3</sub>C(O)O<sub>2</sub> under these conditions that are generated via Reactions R7, R10, and R11 following iPrONO decomposition to CH<sub>3</sub> and CH<sub>3</sub>CHO via Reaction R6. At 254 nm, the influence of CH<sub>3</sub>O<sub>2</sub> and CH<sub>3</sub>C(O)O<sub>2</sub> on ensuing photochemistry may be more significant. This is due to a higher quantum yield of Reaction R6 at 254 nm, which is estimated to be 0.86 under vacuum (Calvert and Pitts, 1966)."**

R1.2) P1 Line 4: Delete "t" before "λ = 254 nm"

Deleted.

R1.3) P3 Line 18-22: The author tried to use a NO<sub>x</sub> analyzer (Model 405 nm, 2B Technologies) to quantify the NO/NO<sub>2</sub> mixing ratio. As shown in Figure S1 (b), the alkyl nitrates also show absorption at 405 nm which is the working wavelength of the NO<sub>x</sub> analyzer. Though the absorption cross section of alkyl nitrates is about one order of magnitude lower than that of the NO<sub>2</sub>, the mixing ratio of alkyl nitrates can be much higher than NO<sub>2</sub>, thus bias the NO<sub>2</sub> and NO measurement. To perform the measurement, the author needs to correct the absorption by the alkyl nitrates.

Please see the text on P3, L23, where we stated that “we constrained [NO] and [NO<sub>2</sub>] using the photochemical model discussed in Section 2.4” because we had difficulty correcting for absorption by the alkyl nitrites.

R1.4) P4 Line 20-24: To test this hypothesize, the author can simply measure the emission spectra of the UV lamps. This measurement can provide a direct proof to see the influence of longer wavelengths emission lines.

This is a fair point. We did not have access to an instrument that could measure the emission spectra of the 254 nm UV lamps; in the end, because OFR254-i(iPrONO) is not recommended, we did not pursue it further.

R1.5): A recent study by Ye et al. 2018 (ACP) found under wet conditions, heterogeneous uptake of SO<sub>2</sub> onto organic aerosol was found to be the dominant sink of SO<sub>2</sub>, likely owing to reactions between SO<sub>2</sub> and organic peroxides. This SO<sub>2</sub> loss mechanism may bias the OH exposure measurement.

Thank you for the reference. In this work, OH exposure measurements were not conducted in the presence of organic aerosol (no VOCs were injected aside from alkyl nitrites, which themselves do not generate aerosol). Therefore we think that this is not an issue that is relevant to our results. However, we added the following sentence to the end of Section 2.2.2 to alert readers of the potential effect:

**“While not applicable in this work, we note that heterogeneous uptake of SO<sub>2</sub> onto organic aerosol may bias OH exposure measurements (Ye et al., 2018).”**

We added the following citation to references:

**Ye, J., Abbatt, J. P. D., and Chan, A. W. H.: Novel pathway of SO<sub>2</sub> oxidation in the atmosphere: reactions with monoterpene ozonolysis intermediates and secondary organic aerosol, *Atmos. Chem. Phys.*, 18, 5549-5565, <https://doi.org/10.5194/acp-18-5549-2018>, 2018.**

R1.6) P6 Line 23-24: I suggest the author add the reference data into that plot to show directly that their results are in good agreement with literature data.

We added isopropyl nitrite absorption cross sections obtained from  $\lambda = 300$  to 450 nm by Raff and Finlayson-Pitts (2010) (black dashed line) to a revised Figure S1 shown below:

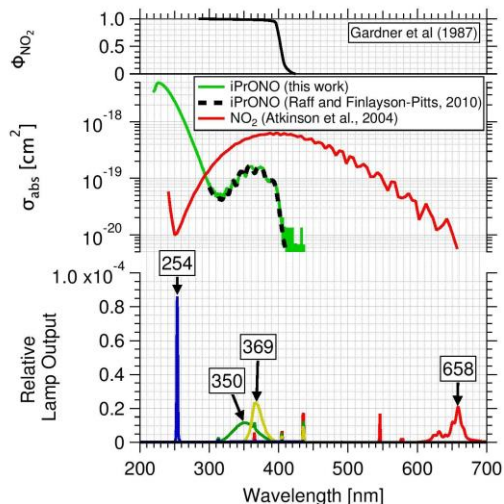

R1.7) P8 Line 6: Add “The model results showed that” before “For [iPrONO]  $\leq$  5 ppm”.

We modified the text as follows:

P8, L6: “Figure 3 shows measured and modeled  $\text{OH}_{\text{exp}}$  and  $\text{NO}_x$  concentrations obtained from photolysis of 0.5 to 20 ppm iPrONO [...] **The model results showed that for [iPrONO]  $\leq$  5 ppm,  $\text{OH}_{\text{exp}}$  increased with increasing [iPrONO] because the rate of OH production increased faster than the rate of OH destruction from reaction with iPrONO and  $\text{NO}_2$ . For [iPrONO]  $>$  5 ppm, the opposite was true and  $\text{OH}_{\text{exp}}$  plateaued or decreased. A maximum  $\text{OH}_{\text{exp}} = 7.8 \times 10^{10}$  molecules  $\text{cm}^{-3}$  s was achieved via photolysis of 10ppm iPrONO, with corresponding modeled [NO] and [NO<sub>2</sub>] values of 148 and 405 ppb respectively.”**

R1.8) P11 Line 28-29: How much can  $\text{NO}_3$  radical be produced in the OFR? If this is already included in the model, the author could show the results to indicate how important of  $\text{NO}_3$  radical oxidation.

The maximum  $\text{NO}_3$  concentration in the model cases in this study is only  $\sim 1$  ppt, since there is no  $\text{O}_3$  in OFR-i(iPrONO) and the second step of the  $\text{NO}_2 \rightarrow \text{HNO}_3 \rightarrow \text{NO}_3$  oxidation chain by OH is slow. We thus do not report the negligible  $\text{NO}_3$  concentrations in the figures but added the following sentence at the end of Section 3.2:

**“Modeled  $\text{NO}_3$  concentrations were negligible in OFR-i(iPrONO) ( $< \sim 1$  ppt) because there is no  $\text{O}_3$  present and  $\text{NO}_3$  production via  $\text{NO}_2 + \text{OH} \rightarrow \text{HNO}_3$  and  $\text{HNO}_3 + \text{OH} \rightarrow \text{NO}_3 + \text{H}_2\text{O}$  reactions was small.”**
